# Supplementary material for: Mechanical Egg Activation and Rearing of First Instar Larvae of Sirex noctilio (Hymenoptera: Siricidae)
Source: Preprints.org preprint supplement (doi:10.20944/preprints202310.2070.v1), 2023-10-31
Supplement: Supplementary file 1 [file supplementary]

## SUPPLEMENTARY MATERIAL

**Table S1.** *Pinus* sp. log batch information

| Batch no. | Province     | Area       | <i>Pinus</i> sp.     | <i>Pinus</i> sp. age (years) | Emergence season |
|-----------|--------------|------------|----------------------|------------------------------|------------------|
| 1         | Western Cape | Riversdale | <i>Pinus radiata</i> | 28                           | Mar-Apr 2021     |
| 2         | Mpumalanga   | Sabie      | <i>Pinus patula</i>  | 12-16                        | Oct-Nov 2022     |
| 3         | Western Cape | Riversdale | <i>Pinus radiata</i> | 24                           | Feb-Mar 2023     |

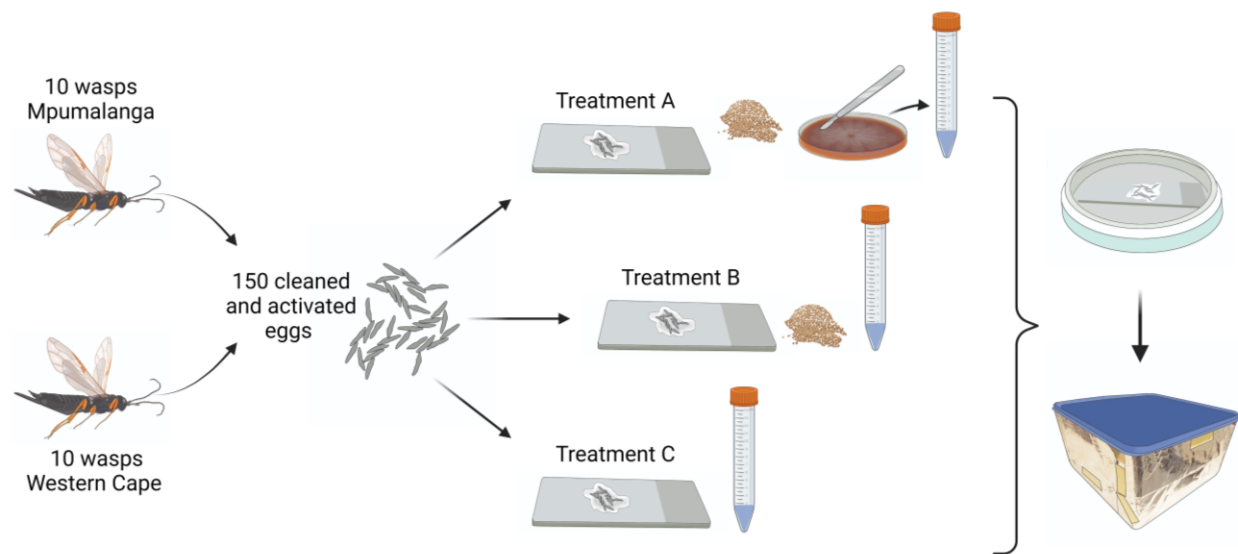

**Figure S1.** Treatments applied after egg activation of 10 *Sirex noctilio* female wasps from Mpumalanga and Western Cape. Each treatment contained 50 cleaned and activated eggs which was stored on a microscope slide inside a Petri dish with damp filter paper. Petri dishes were placed in a cake saver, covered in tinfoil, inside a dark incubator. (Illustration created in BioRender.com. Illustration components created by Glenda Brits, Senior Graphic Designer, Department for Education Innovation, University of Pretoria, South Africa).

**Table S2.** Ingredients for *Sirex noctilio* artificial diet with manufacturers

| Ingredient                             | Manufacturer                    | Amount    |
|----------------------------------------|---------------------------------|-----------|
| Distilled water                        |                                 | 257.81 ml |
| Agar                                   | Sigma-Aldrich (A7921-100G)      | 8.20 g    |
| <b>Group 1</b>                         |                                 |           |
| Raw wheat germ                         | Sigma-Aldrich (W0125)           | 19.92 g   |
| Torula yeast powder                    | Sigma-Aldrich (51475-500G)      | 10.55 g   |
| <b>Group 2</b>                         |                                 |           |
| Wesson salt mixture                    | MP Biomedicals (CAT NO. 902851) | 1.05 g    |
| Sorbic acid                            | Natural Resources Canada        | 0.73 g    |
| Methyl paraben                         | Natural Resources Canada        | 0.73 g    |
| Sucrose (or household sugar)           | Natural Resources Canada        | 5.86 g    |
| Casein from bovine milk                | Sigma-Aldrich (C6554-500G)      | 3.52 g    |
| Sodium propionate                      | Natural Resources Canada        | 0.45 g    |
| <b>Group 3</b>                         |                                 |           |
| Cholesterol                            | Sigma-Aldrich (C8667-5G)        | 0.35 g    |
| Autoclaved wheatgerm oil               | Essentially Natural             | 1.64 ml   |
| <b>Group 4</b>                         |                                 |           |
| Choline chloride                       | Sigma-Aldrich (C7527-100G)      | 0.09 g    |
| Vanderzant vitamin mixture for insects | Sigma-Aldrich (V1007-100G)      | 1.55 g    |
| Vitamin A beadlets                     | Natural Resources Canada        | 0.12 g    |
| <b>Group 5</b>                         |                                 |           |
| Alpha cellulose                        | Sigma-Aldrich (C6429-500G)      | 45.70 g   |
| <b>Group 6</b>                         |                                 |           |
| Streptomycin sulfate salt              | Sigma-Aldrich (S9137)           | 0.3 g     |
| SABAX pour water                       | Adcock Ingram                   | 2 ml      |
| <b>Group 7</b>                         |                                 |           |
| Autoclaved pine sawdust                |                                 | 50 g      |

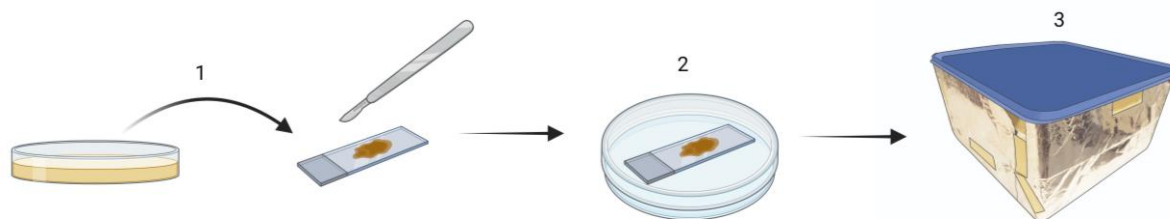

**Figure S2.** Rearing of *Sirex noctilio* larvae emerged from activated eggs. **(1)** A small amount of diet was placed on a microscope slide and grooves were made on the diet surface using a scalpel. **(2)** The slide was placed in a Petri dish with damp filter paper and larvae were transferred onto the diet whereafter the Petri dish was sealed with Parafilm. **(3)** Petri dishes were stored in a cake saver covered in tinfoil inside a dark incubator. (Illustration created in BioRender.com. Illustration components created by Glenda Brits, Senior Graphic Designer, Department for Education Innovation, University of Pretoria, South Africa).
